# Supplementary material
Source: PubMed Central journal article supplement (PMC5984044)
Supplement: NIHMS966101-supplement-Supplement1.pdf [file NIHMS966101-supplement-Supplement1.pdf]

## Supplementary Appendix

This appendix has been provided by the authors to give readers additional information about their work.

Supplement to: Rough K, Seage GR III, Williams PL, et al. Birth outcomes for pregnant women with HIV using tenofovir–emtricitabine. *N Engl J Med* 2018;378:1593-603. DOI: 10.1056/NEJMoa1701666

## **Supplemental Materials:**

### **Birth outcomes for pregnant women using tenofovir/emtricitabine in the US**

Kathryn Rough

George R. Seage III

Paige L. Williams

Sonia Hernandez-Diaz

Yanling Huo

Ellen G. Chadwick

Judith S. Currier

Risa M. Hoffman

Emily Barr

David E. Shapiro

Kunjal Patel

## TABLE OF CONTENTS

|                                                                                                                                                                                                                                   |    |
|-----------------------------------------------------------------------------------------------------------------------------------------------------------------------------------------------------------------------------------|----|
| <b>Supplemental Figure S1.</b> Flowchart of study pooling and inclusion criteria.....                                                                                                                                             | 4  |
| <b>Supplemental Table S1.</b> Full maternal characteristics by antiretroviral regimen during pregnancy.....                                                                                                                       | 5  |
| <b>Supplemental Table S2.</b> Maternal characteristics by initial antiretroviral regimen during pregnancy: TDF/FTC/Any PI versus ZDV/3TC/Any PI.....                                                                              | 7  |
| <b>Supplemental Table S3.</b> Risk of infant outcomes by initial antiretroviral regimen during pregnancy: TDF/FTC/Any PI versus ZDV/3TC/Any PI.....                                                                               | 9  |
| <b>Supplemental Table S4.</b> Risk ratios for infant outcomes: TDF/FTC/Any PI versus ZDV/3TC/Any PI.....                                                                                                                          | 10 |
| <b>Supplemental Figure S2.</b> Subgroup analyses for comparison of initial antiretroviral regimen during pregnancy and risk of any adverse outcome: Risk ratios and corresponding 95% confidence intervals.....                   | 11 |
| <b>Supplemental Figure S3.</b> Subgroup analyses for comparison of initial antiretroviral regimen during pregnancy and risk of very preterm birth: Risk ratios and corresponding 95% confidence intervals.....                    | 12 |
| <b>Supplemental Figure S4.</b> Subgroup analyses for comparison of initial antiretroviral regimen during pregnancy and risk of very low birth weight: Risk ratios and corresponding 95% confidence intervals.....                 | 13 |
| <b>Supplemental Figure S5.</b> Subgroup analyses for comparison of initial antiretroviral regimen during pregnancy and risk of serious adverse outcome <sup>1</sup> : Risk ratios and corresponding 95% confidence intervals..... | 14 |
| <b>Supplemental Table S5.</b> Regimens switched to after initial regimen of TDF/FTC/LPV/r.....                                                                                                                                    | 15 |

**Supplemental Table S6.** Regimens switched to after initial regimen of TDF/FTC/ATV/r.....16

**Supplemental Table S7.** Regimens switched to after initial regimen of ZDV/3TC/LPV/r.....17

**Quantification of potential selection bias from loss to follow-up**.....18

Supplemental Figure S1. Flowchart of study pooling and inclusion criteria<sup>1</sup>

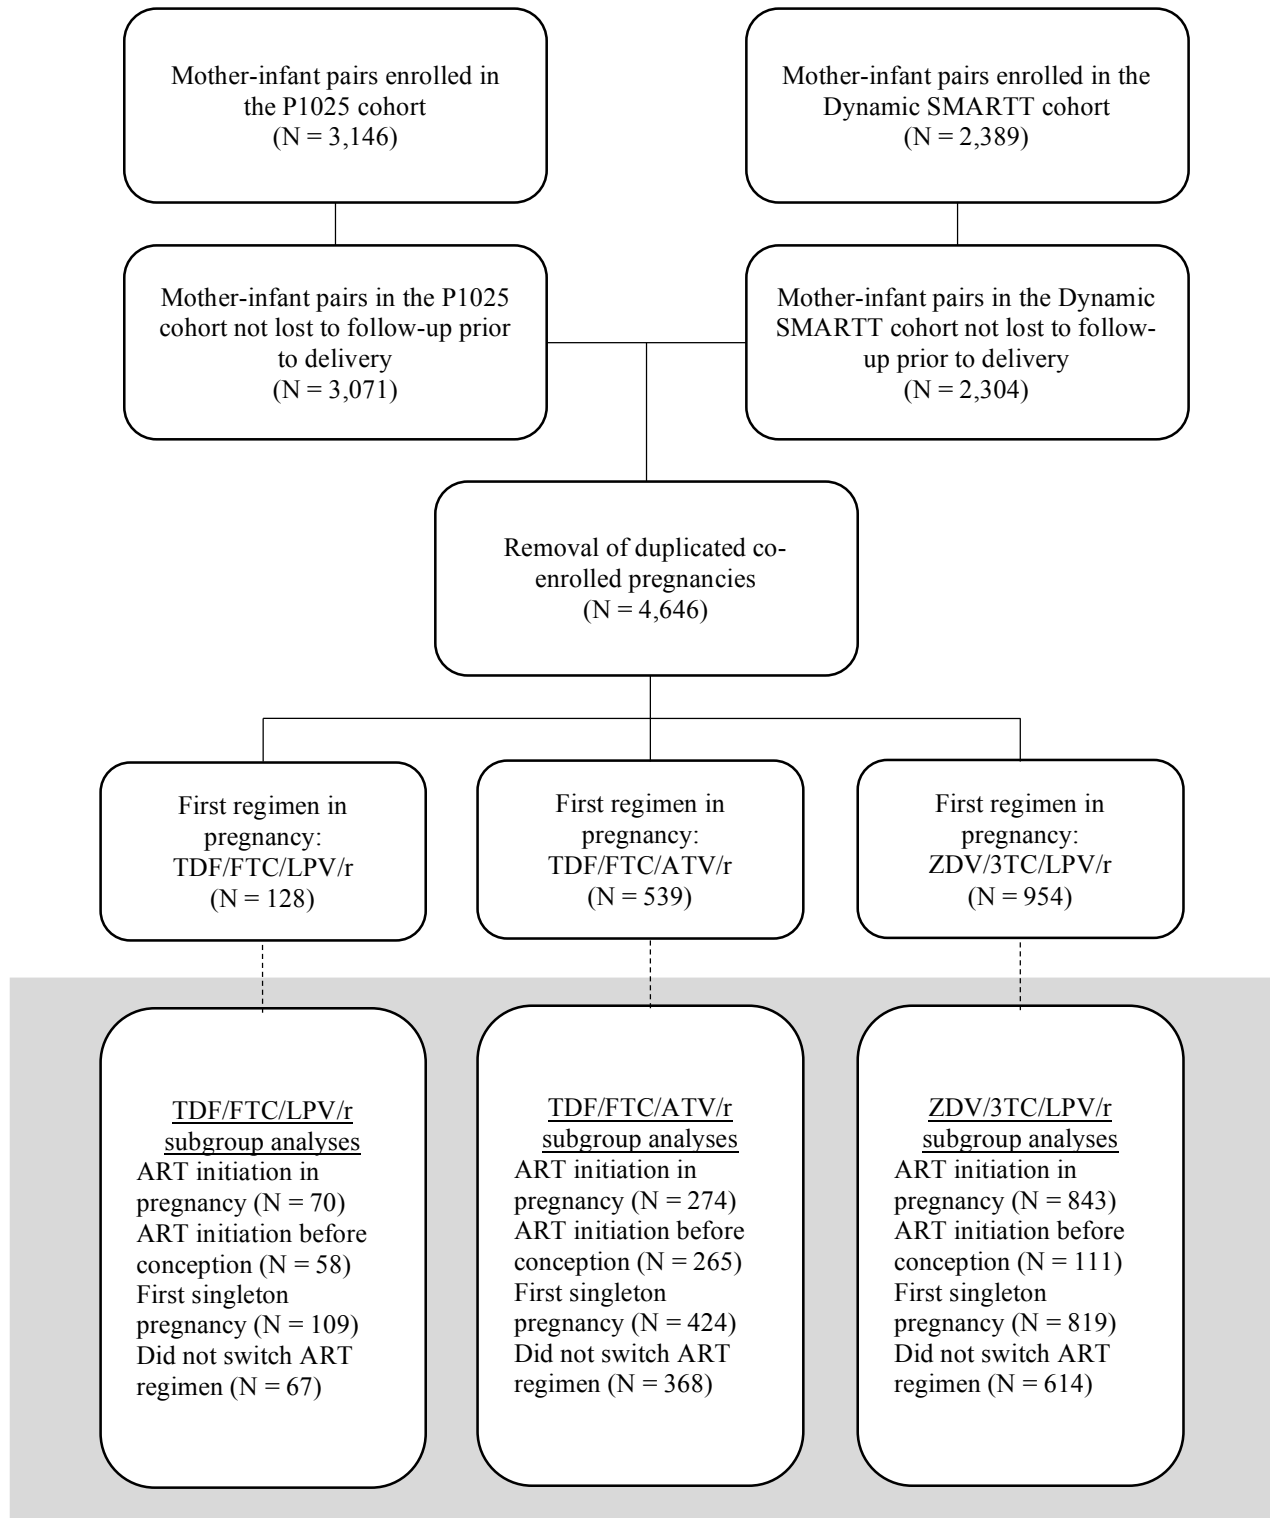

<sup>1</sup> Mothers may not be unique. Some women had multiple pregnancies under study observation. The unit of analysis in this figure is mother-infant pairs.

Supplemental Table S1. Full maternal characteristics<sup>1</sup> by initial antiretroviral regimen during pregnancy

|                                     | Initial regimen during pregnancy |      |               |      |               |      |
|-------------------------------------|----------------------------------|------|---------------|------|---------------|------|
|                                     | TDF/FTC/LPV/r                    |      | TDF/FTC/ATV/r |      | ZDV/3TC/LPV/r |      |
|                                     | n = 128                          |      | n = 539       |      | n = 954       |      |
|                                     | n                                | %    | n             | %    | n             | %    |
| Year of delivery                    |                                  |      |               |      |               |      |
| 2002-2004                           | 0                                | 0.0  | 0             | 0.0  | 29            | 3.0  |
| 2005-2008                           | 38                               | 29.7 | 92            | 17.1 | 260           | 27.3 |
| 2009-2012                           | 76                               | 59.4 | 290           | 53.8 | 554           | 58.1 |
| 2012-2016                           | 14                               | 10.9 | 157           | 29.1 | 111           | 11.6 |
| Age                                 |                                  |      |               |      |               |      |
| 24 years or less                    | 50                               | 39.1 | 136           | 25.2 | 355           | 37.2 |
| 25 to 34 years                      | 67                               | 52.3 | 293           | 54.4 | 473           | 49.6 |
| 35 years or more                    | 11                               | 8.6  | 109           | 20.2 | 125           | 13.1 |
| Missing                             | 0                                | 0.0  | 1             | 0.2  | 1             | 0.1  |
| Education                           |                                  |      |               |      |               |      |
| Less than high school               | 34                               | 26.6 | 188           | 34.9 | 331           | 34.7 |
| High school diploma                 | 61                               | 47.7 | 240           | 44.5 | 427           | 44.8 |
| College or more                     | 33                               | 25.8 | 109           | 20.2 | 194           | 20.3 |
| Missing                             | 0                                | 0.0  | 2             | 0.4  | 2             | 0.2  |
| Race/ethnicity                      |                                  |      |               |      |               |      |
| Non-Hispanic White                  | 15                               | 11.7 | 44            | 8.2  | 68            | 7.1  |
| Non-Hispanic Black                  | 81                               | 63.3 | 365           | 67.7 | 611           | 64.0 |
| Hispanic                            | 30                               | 23.4 | 120           | 22.3 | 258           | 27.0 |
| Other                               | 1                                | 0.8  | 9             | 1.7  | 11            | 1.2  |
| Missing                             | 1                                | 0.8  | 1             | 0.2  | 6             | 0.6  |
| First CD4 in pregnancy              |                                  |      |               |      |               |      |
| Less than 250 cells/mm <sup>3</sup> | 30                               | 23.4 | 100           | 18.6 | 194           | 20.3 |
| 250 to 500 cells/mm <sup>3</sup>    | 47                               | 36.7 | 205           | 38.0 | 381           | 39.9 |
| More than 500 cells/mm <sup>3</sup> | 47                               | 36.7 | 225           | 41.7 | 365           | 38.3 |
| Missing                             | 4                                | 3.1  | 9             | 1.7  | 14            | 1.5  |
| First viral RNA in pregnancy        |                                  |      |               |      |               |      |
| Less than 400 copies/mL             | 61                               | 47.7 | 277           | 51.4 | 281           | 29.5 |
| 400 to 10,000 copies/mL             | 33                               | 25.8 | 137           | 25.4 | 361           | 37.8 |
| More than 10,000 copies/mL          | 33                               | 25.8 | 122           | 22.6 | 305           | 32.0 |
| Missing                             | 1                                | 0.8  | 3             | 0.6  | 7             | 0.7  |
| Timing of HIV diagnosis             |                                  |      |               |      |               |      |
| Before pregnancy                    | 107                              | 83.6 | 470           | 87.2 | 673           | 70.5 |
| During pregnancy                    | 21                               | 16.4 | 69            | 12.8 | 278           | 29.1 |
| Missing                             | 0                                | 0.0  | 0             | 0.0  | 3             | 0.3  |
| Timing of regimen initiation        |                                  |      |               |      |               |      |
| Before pregnancy                    | 58                               | 45.3 | 265           | 49.2 | 111           | 11.6 |
| Trimester 1                         | 18                               | 14.1 | 82            | 15.2 | 115           | 12.1 |
| Trimester 2 or 3                    | 52                               | 40.6 | 192           | 35.6 | 728           | 76.3 |
| Alcohol use during pregnancy        |                                  |      |               |      |               |      |
| Yes                                 | 25                               | 19.5 | 92            | 17.1 | 182           | 19.1 |

| Initial regimen during pregnancy                             |               |      |               |      |               |      |
|--------------------------------------------------------------|---------------|------|---------------|------|---------------|------|
|                                                              | TDF/FTC/LPV/r |      | TDF/FTC/ATV/r |      | ZDV/3TC/LPV/r |      |
|                                                              | n = 128       |      | n = 539       |      | n = 954       |      |
|                                                              | n             | %    | n             | %    | n             | %    |
| No                                                           | 91            | 71.1 | 432           | 80.1 | 705           | 73.9 |
| <i>Missing</i>                                               | 12            | 9.4  | 15            | 2.8  | 67            | 7.0  |
| Tobacco use during pregnancy                                 |               |      |               |      |               |      |
| Yes                                                          | 30            | 23.4 | 105           | 19.5 | 182           | 19.1 |
| No                                                           | 77            | 60.2 | 387           | 71.8 | 628           | 65.8 |
| <i>Missing</i>                                               | 21            | 16.4 | 47            | 8.7  | 144           | 15.1 |
| Illicit drug use during pregnancy                            |               |      |               |      |               |      |
| Yes                                                          | 21            | 16.4 | 61            | 11.3 | 115           | 12.1 |
| No                                                           | 85            | 66.4 | 427           | 79.2 | 687           | 72.0 |
| <i>Missing</i>                                               | 22            | 17.2 | 51            | 9.5  | 152           | 15.9 |
| Pregestational diabetes                                      |               |      |               |      |               |      |
| Yes                                                          | 1             | 0.8  | 10            | 1.9  | 12            | 1.3  |
| No                                                           | 126           | 98.4 | 527           | 97.8 | 939           | 98.4 |
| <i>Missing</i>                                               | 1             | 0.8  | 2             | 0.4  | 3             | 0.3  |
| Hepatitis B or C during pregnancy                            |               |      |               |      |               |      |
| Yes                                                          | 20            | 15.6 | 71            | 13.2 | 99            | 10.4 |
| No                                                           | 108           | 84.4 | 468           | 86.8 | 855           | 89.6 |
| Sexually transmitted infection <sup>2</sup> during pregnancy |               |      |               |      |               |      |
| Yes                                                          | 36            | 28.1 | 208           | 38.6 | 373           | 39.1 |
| No                                                           | 78            | 60.9 | 297           | 55.1 | 513           | 53.8 |
| <i>Missing</i>                                               | 14            | 10.9 | 34            | 6.3  | 68            | 7.1  |

Abbreviations: TDF, tenofovir disoproxil fumarate; FTC, emtricitabine; LPV/r, ritonavir-boosted lopinavir; ATV/r, ritonavir-boosted atazanavir; ZDV, zidovudine; 3TC, lamivudine

<sup>1</sup> Mothers may not be unique. Some women had multiple pregnancies under study observation. The unit of analysis is the mother-infant pair. Women are classified according to the initial antiretroviral therapy (ART) regimen received during pregnancy.

<sup>2</sup> Sexually transmitted infections include syphilis, gonorrhea, chlamydia, genital herpes, or "other" sexually transmitted infections noted in the medical chart.

Supplemental Table S2. Maternal characteristics<sup>1</sup> by initial antiretroviral regimen during pregnancy: TDF/FTC/Any PI versus ZDV/3TC/Any PI

|                                     | Initial regimen during pregnancy |      |                              |      |
|-------------------------------------|----------------------------------|------|------------------------------|------|
|                                     | TDF/FTC/Any PI<br>n = 960        |      | ZDV/3TC/Any PI<br>n = 1, 593 |      |
|                                     | n                                | %    | n                            | %    |
| Birth year                          |                                  |      |                              |      |
| 2002-2004                           | 0                                | 0.0  | 138                          | 8.7  |
| 2005-2008                           | 178                              | 18.5 | 610                          | 38.3 |
| 2009-2012                           | 514                              | 53.5 | 693                          | 43.5 |
| 2012-2016                           | 268                              | 27.9 | 152                          | 9.5  |
| Age                                 |                                  |      |                              |      |
| 24 years or less                    | 254                              | 26.5 | 592                          | 37.2 |
| 25 to 34 years                      | 533                              | 55.5 | 785                          | 49.3 |
| 35 years or more                    | 170                              | 17.7 | 214                          | 13.4 |
| Missing                             | 3                                | 0.3  | 2                            | 0.1  |
| Education                           |                                  |      |                              |      |
| Less than HS                        | 313                              | 32.6 | 570                          | 35.8 |
| HS diploma                          | 434                              | 45.2 | 690                          | 43.3 |
| College or more                     | 209                              | 21.8 | 327                          | 20.5 |
| Missing                             | 4                                | 0.4  | 6                            | 0.4  |
| Race/ethnicity                      |                                  |      |                              |      |
| Non-Hispanic White                  | 81                               | 8.4  | 113                          | 7.1  |
| Non-Hispanic Black                  | 629                              | 65.5 | 966                          | 60.6 |
| Hispanic                            | 233                              | 24.3 | 484                          | 30.4 |
| Other                               | 15                               | 1.6  | 19                           | 1.2  |
| Missing                             | 2                                | 0.2  | 11                           | 0.7  |
| First CD4 in pregnancy              |                                  |      |                              |      |
| Less than 250 cells/mm <sup>3</sup> | 187                              | 19.5 | 293                          | 18.4 |
| 250 to 500 cells/mm <sup>3</sup>    | 374                              | 39.0 | 676                          | 42.4 |
| More than 500 cells/mm <sup>3</sup> | 379                              | 39.5 | 591                          | 37.1 |
| Missing                             | 20                               | 2.1  | 33                           | 2.1  |
| First viral RNA in pregnancy        |                                  |      |                              |      |
| Less than 400 copies/mL             | 503                              | 52.4 | 469                          | 29.4 |
| 400 to 10,000 copies/mL             | 224                              | 23.3 | 601                          | 37.7 |
| More than 10,000 copies/mL          | 223                              | 23.2 | 500                          | 31.4 |
| Missing                             | 10                               | 1.0  | 23                           | 1.4  |
| Diagnosed before pregnancy          |                                  |      |                              |      |
| Yes                                 | 834                              | 86.9 | 1,112                        | 69.8 |
| No                                  | 124                              | 12.9 | 478                          | 30.0 |
| Missing                             | 2                                | 0.2  | 3                            | 0.2  |
| Timing of regimen initiation        |                                  |      |                              |      |
| Before pregnancy                    | 490                              | 51.0 | 240                          | 15.1 |
| Trimester 1                         | 135                              | 14.1 | 177                          | 11.1 |
| Trimester 2/3                       | 335                              | 34.9 | 1,176                        | 73.8 |
| Alcohol use                         |                                  |      |                              |      |
| Yes                                 | 156                              | 16.3 | 298                          | 18.7 |
| No                                  | 767                              | 79.9 | 1,166                        | 73.2 |



| Initial regimen during pregnancy                                |                           |      |                              |      |
|-----------------------------------------------------------------|---------------------------|------|------------------------------|------|
|                                                                 | TDF/FTC/Any PI<br>n = 960 |      | ZDV/3TC/Any PI<br>n = 1, 593 |      |
|                                                                 | n                         | %    | n                            | %    |
| <i>Missing</i>                                                  | 37                        | 3.9  | 129                          | 8.1  |
| Tobacco use                                                     |                           |      |                              |      |
| Yes                                                             | 188                       | 19.6 | 295                          | 18.5 |
| No                                                              | 676                       | 70.4 | 997                          | 62.6 |
| <i>Missing</i>                                                  | 96                        | 10.0 | 301                          | 18.9 |
| Illicit drug use                                                |                           |      |                              |      |
| Yes                                                             | 115                       | 12.0 | 191                          | 12.0 |
| No                                                              | 741                       | 77.2 | 1,079                        | 67.7 |
| <i>Missing</i>                                                  | 104                       | 10.8 | 323                          | 20.3 |
| Pregestational diabetes                                         |                           |      |                              |      |
| Yes                                                             | 15                        | 1.6  | 24                           | 1.5  |
| No                                                              | 939                       | 97.8 | 1,564                        | 98.2 |
| <i>Missing</i>                                                  | 6                         | 0.6  | 5                            | 0.3  |
| Hepatitis                                                       |                           |      |                              |      |
| Yes                                                             | 135                       | 14.1 | 153                          | 9.6  |
| No                                                              | 825                       | 85.9 | 1,440                        | 90.4 |
| Sexually transmitted infection <sup>2</sup><br>during pregnancy |                           |      |                              |      |
| Yes                                                             | 338                       | 35.2 | 586                          | 36.8 |
| No                                                              | 553                       | 57.6 | 849                          | 53.3 |
| <i>Missing</i>                                                  | 69                        | 7.2  | 158                          | 9.9  |
| Protease inhibitors                                             |                           |      |                              |      |
| + LPV/r                                                         | 128                       | 13.3 | 954                          | 59.9 |
| + ATV/r                                                         | 539                       | 56.1 | 47                           | 3.0  |
| + DRV/r                                                         | 164                       | 17.1 | 48                           | 3.0  |
| + NFV                                                           | 13                        | 1.4  | 497                          | 31.2 |
| + Other PI                                                      | 116                       | 12.1 | 47                           | 3.0  |

Abbreviations: TDF, tenofovir disoproxil fumarate; FTC, emtricitabine; PI, protease inhibitor; ZDV, zidovudine; 3TC, lamivudine; LPV, lopinavir; ATV, atazanavir; DRV, darunavir; NFV, nelfinavir

<sup>1</sup>Mothers may not be unique. Some women had multiple pregnancies under study observation.

<sup>2</sup>Sexually transmitted infections include syphilis, gonorrhea, chlamydia, genital herpes, or “other” sexually transmitted infections noted in the medical chart.

Supplemental Table S3. Risk of infant outcomes by initial antiretroviral regimen during pregnancy: TDF/FTC/Any PI versus ZDV/3TC/Any PI

| Outcome                             | Initial antiretroviral regimen during pregnancy |          |              |                |          |              |
|-------------------------------------|-------------------------------------------------|----------|--------------|----------------|----------|--------------|
|                                     | TDF/FTC/Any PI                                  |          |              | ZDV/3TC/Any PI |          |              |
|                                     | n                                               | Risk (%) | 95% CI       | n              | Risk (%) | 95% CI       |
| Preterm birth <sup>1</sup>          | 170                                             | 17.9     | (15.4, 20.3) | 311            | 19.7     | (17.8, 21.7) |
| Very preterm birth <sup>2</sup>     | 47                                              | 4.9      | (3.6, 6.3)   | 67             | 4.3      | (3.3, 5.3)   |
| Low birth weight <sup>3</sup>       | 167                                             | 17.7     | (15.2, 20.1) | 275            | 17.8     | (15.9, 19.7) |
| Very low birth weight <sup>4</sup>  | 17                                              | 1.8      | (1.0, 2.6)   | 32             | 2.1      | (1.4, 2.8)   |
| Adverse outcome <sup>5</sup>        | 237                                             | 24.9     | (22.2, 27.7) | 426            | 27.3     | (25.1, 29.5) |
| Severe adverse outcome <sup>6</sup> | 51                                              | 5.4      | (3.9, 6.8)   | 83             | 5.3      | (4.2, 6.5)   |

Abbreviations: TDF, tenofovir disoproxil fumarate; FTC, emtricitabine; PI, protease inhibitor; ZDV, zidovudine; 3TC, lamivudine; CI, confidence interval

<sup>1</sup>Preterm birth defined as <37 weeks gestational age

<sup>2</sup>Very preterm birth defined as <34 weeks gestational age

<sup>3</sup>Low birth weight defined as <2,500g

<sup>4</sup>Very low birth weight defined as <1,500g

<sup>5</sup>Adverse outcome defined as preterm birth, low birth weight, fetal loss, or neonatal mortality (within 14 days after delivery)

<sup>6</sup>Serious adverse outcome defined as very preterm birth, very low birth weight, fetal loss, or neonatal mortality (within 14 days after delivery)

Supplemental Table S4. Risk ratios for infant outcomes: TDF/FTC/Any PI versus ZDV/3TC/Any PI

|                                     | Crude |              | Adjusted <sup>1</sup> |              |
|-------------------------------------|-------|--------------|-----------------------|--------------|
|                                     | RR    | 95% CI       | RR                    | 95% CI       |
| Preterm birth <sup>2</sup>          | 0.90  | (0.76, 1.07) | 0.77                  | (0.62, 0.96) |
| Very preterm birth <sup>3</sup>     | 1.16  | (0.81, 1.67) | 0.99                  | (0.66, 1.48) |
| Low birth weight <sup>4</sup>       | 0.86  | (0.68, 1.09) | 0.90                  | (0.73, 1.11) |
| Very low birth weight <sup>5</sup>  | 0.87  | (0.49, 1.56) | 0.69                  | (0.36, 1.31) |
| Adverse outcome <sup>6</sup>        | 0.87  | (0.72, 1.05) | 0.84                  | (0.71, 1.00) |
| Severe adverse outcome <sup>7</sup> | 1.01  | (0.72, 1.41) | 0.90                  | (0.62, 1.31) |

Abbreviations: TDF, tenofovir disoproxil fumarate; FTC, emtricitabine; PI, protease inhibitor; ZDV, zidovudine; 3TC, lamivudine; RR, risk ratio; CI, confidence interval

<sup>1</sup>Modified Poisson models adjusted for race/ethnicity, smoking, diabetes, sexually transmitted infection, and timing of antiretroviral therapy initiation

<sup>2</sup>Preterm birth defined as <37 weeks gestational age

<sup>3</sup>Very preterm birth defined as <34 weeks gestational age

<sup>4</sup>Low birth weight defined as <2,500g

<sup>5</sup>Very low birth weight defined as <1,500g

<sup>6</sup>Adverse outcome defined as preterm birth, low birth weight, fetal loss, or neonatal mortality (within 14 days after delivery)

<sup>7</sup>Serious adverse outcome defined as very preterm birth, very low birth weight, fetal loss, or neonatal mortality (within 14 days after delivery)

Supplemental Figure S2. Subgroup analyses for comparison of initial antiretroviral regimen during pregnancy and risk of any adverse outcome<sup>1</sup>: Risk ratios and corresponding 95% confidence intervals

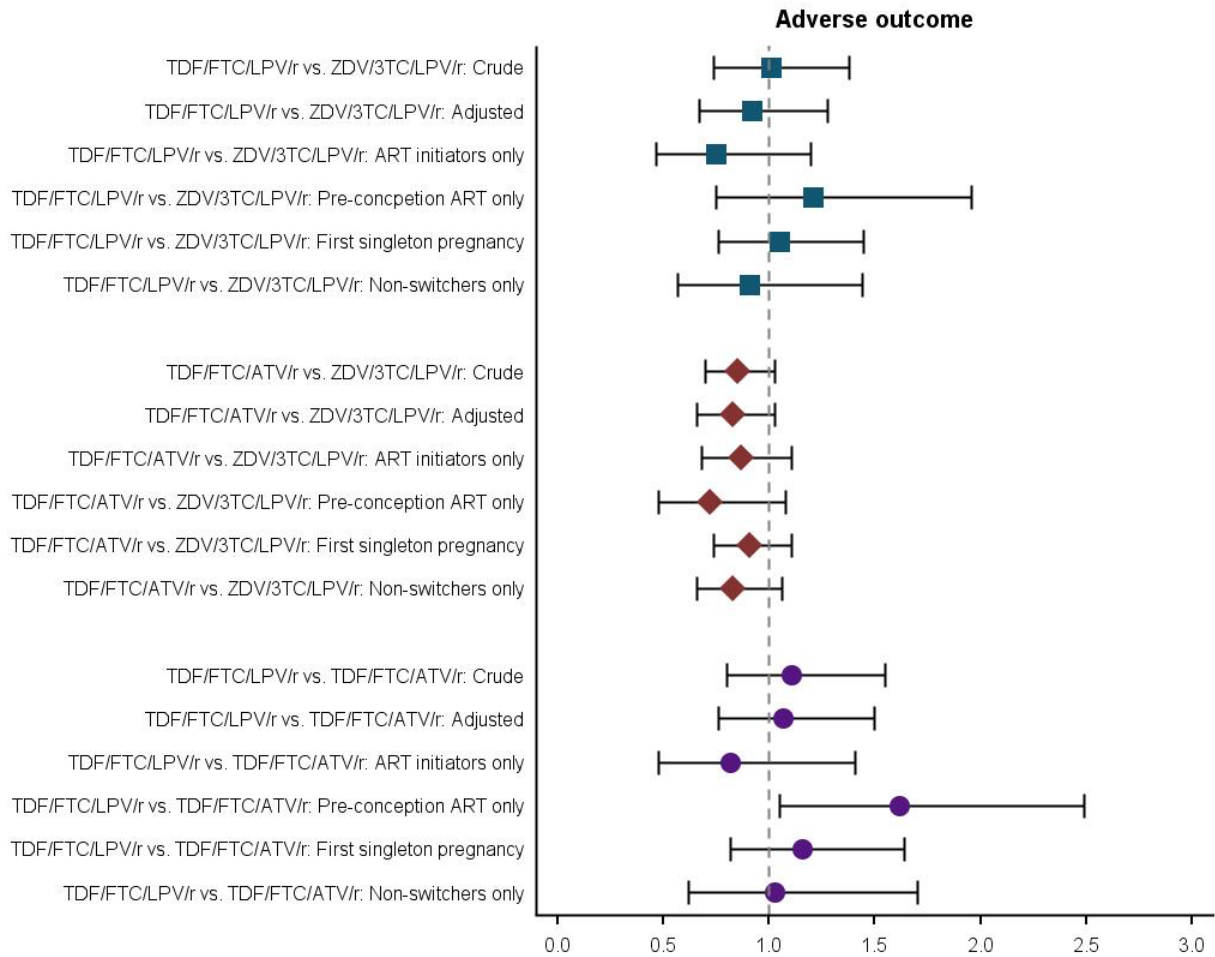

Abbreviations: TDF, tenofovir disoproxil fumarate; FTC, emtricitabine; LPV/r, ritonavir-boosted lopinavir; ZDV, zidovudine; 3TC, lamivudine; ATV/r, ritonavir-boosted atazanavir

Note: "Adjusted" risk ratios obtained from log-binomial models adjusted for race/ethnicity, smoking, diabetes, sexually transmitted infection, and timing of antiretroviral therapy initiation

<sup>1</sup>Adverse outcome defined as preterm birth, low birth weight, fetal loss, or neonatal mortality (within 14 days after delivery)

Supplemental Figure S3. Subgroup analyses for comparison of initial antiretroviral regimen during pregnancy and risk of very preterm birth<sup>1</sup>: Risk ratios and corresponding 95% confidence intervals

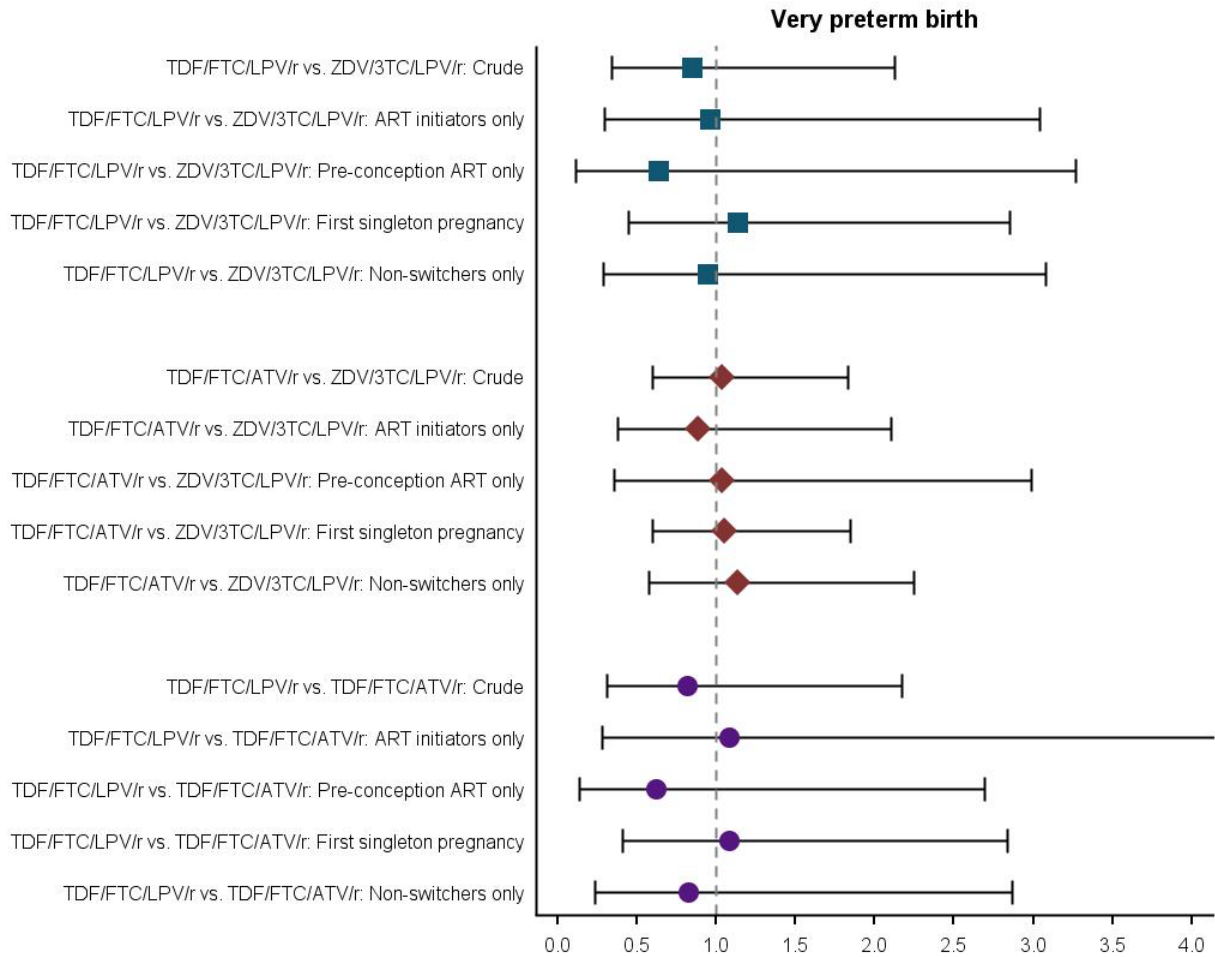

Abbreviations: TDF, tenofovir disoproxil fumarate; FTC, emtricitabine; LPV/r, ritonavir-boosted lopinavir; ZDV, zidovudine; 3TC, lamivudine; ATV/r, ritonavir-boosted atazanavir

<sup>1</sup>Very preterm birth defined as <34 weeks gestational age

Supplemental Figure S4. Subgroup analyses for comparison of initial antiretroviral regimen during pregnancy and risk of very low birth weight<sup>1</sup>: Risk ratios and corresponding 95% confidence intervals

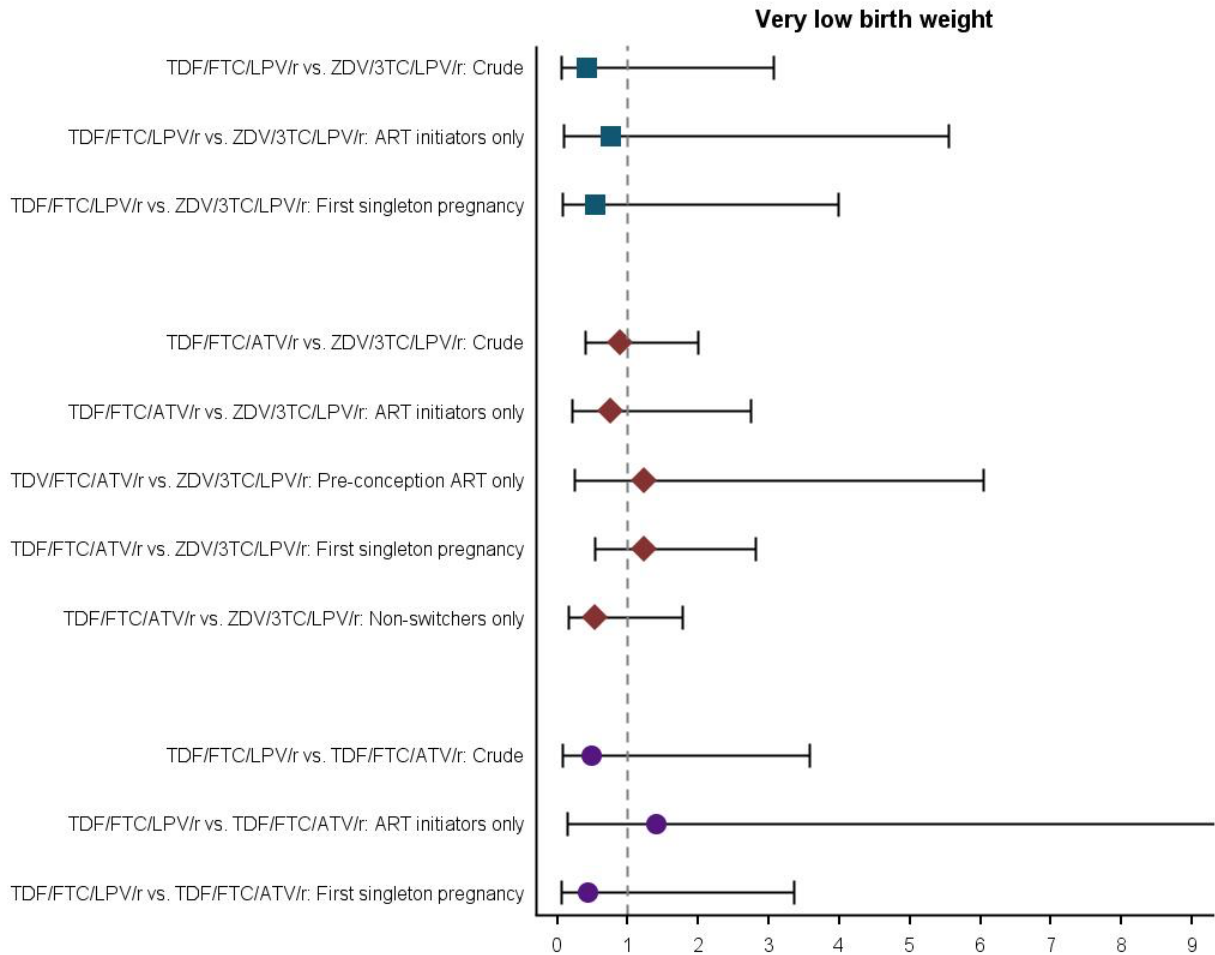

Abbreviations: TDF, tenofovir disoproxil fumarate; FTC, emtricitabine; LPV/r, ritonavir-boosted lopinavir; ZDV, zidovudine; 3TC, lamivudine; ATV/r, ritonavir-boosted atazanavir

<sup>1</sup>Very low birth weight defined as <1,500g

Supplemental Figure S5. Subgroup analyses for comparison of initial antiretroviral regimen during pregnancy and risk of serious adverse outcome<sup>1</sup>: Risk ratios and corresponding 95% confidence intervals

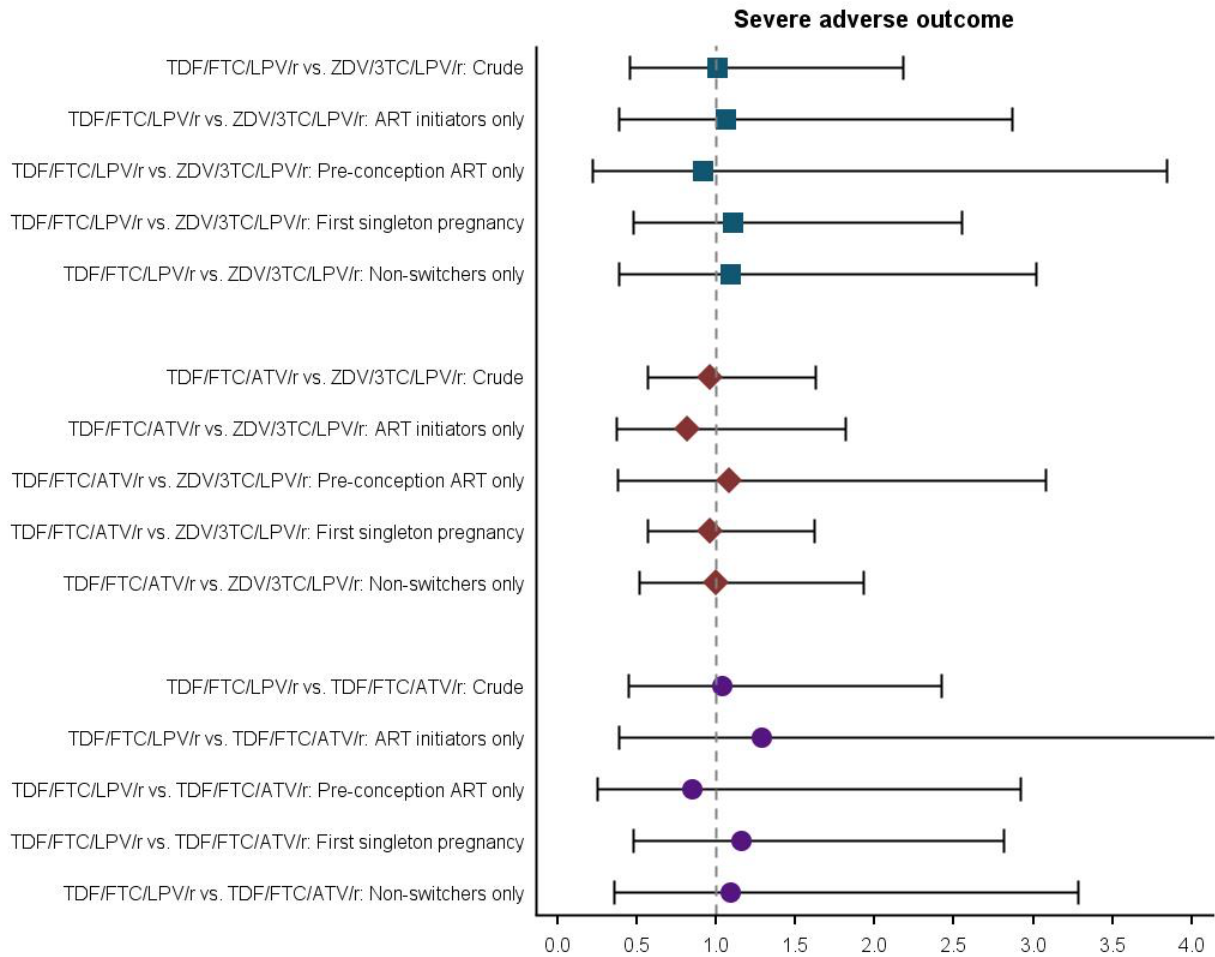

Abbreviations: TDF, tenofovir disoproxil fumarate; FTC, emtricitabine; LPV/r, ritonavir-boosted lopinavir; ZDV, zidovudine; 3TC, lamivudine; ATV/r, ritonavir-boosted atazanavir

<sup>1</sup>Serious adverse outcome defined as very preterm birth, very low birth weight, fetal loss, or neonatal mortality (within 14 days after delivery)

Supplemental Table S5. Regimens switched to after initial regimen of TDF/FTC/LPV/r

|                                          | n  | %    |
|------------------------------------------|----|------|
| TDF/FTC/LPV/r to TDF/FTC/ATV/r           | 2  | 3.3  |
| TDF/FTC/LPV/r to TDF/FTC + other drug(s) | 17 | 27.9 |
| TDF/FTC/LPV/r to ZDV/3TC/LPV/r           | 20 | 32.8 |
| TDF/FTC/LPV/r to ZDV/3TC + other drug(s) | 3  | 4.9  |
| TDF/FTC/LPV/r to other cART regimen      | 12 | 19.7 |
| TDF/FTC/LPV/r to mono- or dual-therapy   | 7  | 11.5 |

Abbreviations: TDF, tenofovir disoproxil fumarate; FTC, emtricitabine; LPV/r, ritonavir-boosted lopinavir; ATV/r, ritonavir-boosted atazanavir; ZDV, zidovudine; 3TC, lamivudine; cART, combination antiretroviral therapy



Supplemental Table S6. Regimens switched to after initial regimen of TDF/FTC/ATV/r

|                                          | n   | %    |
|------------------------------------------|-----|------|
| TDF/FTC/ATV/r to TDF/FTC/LPV/r           | 1   | 0.6  |
| TDF/FTC/ATV/r to TDF/FTC + other drug(s) | 104 | 60.8 |
| TDF/FTC/ATV/r to ZDV/3TC/LPV/r           | 14  | 8.2  |
| TDF/FTC/ATV/r to ZDV/3TC + other drug(s) | 12  | 7.0  |
| TDF/FTC/ATV/r to other cART regimen      | 36  | 21.1 |
| TDF/FTC/ATV/r to mono- or dual-therapy   | 4   | 2.3  |

Abbreviations: TDF, tenofovir disoproxil fumarate; FTC, emtricitabine; LPV/r, ritonavir-boosted lopinavir; ATV/r, ritonavir-boosted atazanavir; ZDV, zidovudine; 3TC, lamivudine; cART, combination antiretroviral therapy

Supplemental Table S7. Regimens switched to after initial regimen of ZDV/3TC/LPV/r

|                                          | n   | %    |
|------------------------------------------|-----|------|
| ZDV/3TC/LPV/r to TDF/FTC/LPV/r           | 34  | 10.0 |
| ZDV/3TC/LPV/r to TDF/FTC/ATV/r           | 45  | 13.2 |
| ZDV/3TC/LPV/r to TDF/FTC + other drug(s) | 63  | 18.5 |
| ZDV/3TC/LPV/r to ZDV/3TC + other drug(s) | 142 | 41.8 |
| ZDV/3TC/LPV/r to other cART regimen      | 27  | 7.9  |
| ZDV/3TC/LPV/r to mono- or dual-therapy   | 29  | 8.5  |

Abbreviations: TDF, tenofovir disoproxil fumarate; FTC, emtricitabine; LPV/r, ritonavir-boosted lopinavir; ATV/r, ritonavir-boosted atazanavir; ZDV, zidovudine; 3TC, lamivudine; cART, combination antiretroviral therapy

## Quantification of potential selection bias from loss to follow-up

### Background:

There were 160 women who enrolled in either SMARTT or P1025 during their pregnancy who were lost to follow-up before delivering. Their birth outcome information is unknown. The exposure classification for many of these women is also unclear because the estimated date of conception was not recorded, making it difficult to determine the first regimen taken during pregnancy.

### Methods:

If the loss to follow-up in our study is related to both antiretroviral regimens received and the pregnancy outcome, there is a potential for selection bias. We used methods described by Greenland [1] and Lash, Fink, and Fox [2] to quantify the potential impact of selection bias caused by the 160 women lost to follow-up. This sensitivity analysis was modeled after one by Huybrechts et al [3] that examined the potential impact of selective terminations on their study of first-trimester SSRI exposure and risk of cardiac malformations.

Below, we present the sensitivity analysis for the comparison of TDF/FTC/LPV/r to ZDV/3TC/LPV/r for the outcome of any adverse event.

To perform the sensitivity analyses, we examine how a range of plausible values for selection probabilities (i.e., the probability of not being lost to follow-up) would impact our estimates.

| <u>Observed</u> | Any adverse event | No adverse event | <u>Corrected</u> | Any adverse event               | No adverse event                |
|-----------------|-------------------|------------------|------------------|---------------------------------|---------------------------------|
| TDF/FTC/LPV/r   | A                 | B                | TDF/FTC/LPV/r    | $A_{\text{correct}} = A/S_{11}$ | $B_{\text{correct}} = B/S_{10}$ |
| ZDV/3TC/LPV/r   | C                 | D                | ZDV/3TC/LPV/r    | $C_{\text{correct}} = C/S_{01}$ | $D_{\text{correct}} = D/S_{00}$ |

A is the observed number of deliveries with adverse events among women receiving TDF/FTC/LPV/r.  
 B is the observed number of deliveries without adverse events among women receiving TDF/FTC/LPV/r.  
 C is the observed number of deliveries with adverse events among women receiving ZDV/3TC/LPV/r.  
 D is the observed number of deliveries without adverse events among women receiving ZDV/3TC/LPV/r.

$S_{00}$  is the probability of not being lost to follow-up for women in the ZDV/3TC/LPV/r exposure group who did not have an adverse event.

$S_{01}$  is the probability of not being lost to follow-up for women in the ZDV/3TC/LPV/r exposure group who had an adverse event.

$S_{10}$  is the probability of not being lost to follow-up for women in the TDF/FTC/LPV/r exposure group who did not have an adverse event.

$S_{11}$  is the probability of not being lost to follow-up for women in the TDF/FTC/LPV/r exposure group who had an adverse event.

$A_{\text{correct}}$  is the corrected number of deliveries with adverse events among women receiving TDF/FTC/LPV/r.

$B_{\text{correct}}$  is the corrected number of deliveries without adverse events among women receiving TDF/FTC/LPV/r.

$C_{\text{correct}}$  is the corrected number of deliveries with adverse events among women receiving ZDV/3TC/LPV/r.

$D_{\text{correct}}$  is the corrected number of deliveries without adverse events among women receiving ZDV/3TC/LPV/r.

RR<sub>obs</sub> is the observed risk ratio.  
 RR<sub>correct</sub> is the corrected risk ratio.

$$RR_{obs} = [A/(A+B)] / [C/(C+D)]$$

$$RR_{correct} = [(A_{correct} / (A_{correct} + B_{correct}))] / [C_{correct} / (C_{correct} + D_{correct})]$$

**Selection probabilities:**

Below is the observed contingency table for the comparison of TDF/FTC/LPV/r to ZDV/3TC/LPV/r for the outcome of any adverse event:

| <u>Observed</u> | Adverse event | No adverse event |
|-----------------|---------------|------------------|
| TDF/FTC/LPV/r   | A = 36        | B = 92           |
| ZDV/3TC/LPV/r   | C = 256       | D = 684          |

Because there were substantially fewer women in the TDF/FTC/LPV/r group compared to the ZDV/3TC/LPV/r group, it has greater potential to be influenced by the 160 women who were lost to follow-up. Therefore, to be more conservative in our conclusions about the sensitivity of our findings to selection bias, we focused the impact of differential loss to follow-up on the TDF/FTC/LPV/r exposure group.

In our study, we found that 3% of pregnancies were lost to follow-up before delivery. For these sensitivity analyses, we assumed that this average probability of being lost to follow up applied to women with ZDV/3TC/LPV/r exposure, whether or not they had an adverse event (S<sub>00</sub> = 0.97 [21.2 additional pregnancies]; S<sub>01</sub> = 0.97 [7.9 additional pregnancies]).

The S<sub>10</sub> and S<sub>11</sub> were tested across a range of values, taking care to ensure that the number of additional cases implied by the selection probabilities never exceeded the 160 participants actually lost to follow-up. The scenarios examined are summarized in the table below:

|           | TDF/FTC/LPV/r                       |                                                                                                                        | ZDV/3TC/LPV/r                       |                                  |
|-----------|-------------------------------------|------------------------------------------------------------------------------------------------------------------------|-------------------------------------|----------------------------------|
|           | No adverse event (S <sub>10</sub> ) | Adverse event (S <sub>11</sub> )                                                                                       | No adverse event (S <sub>00</sub> ) | Adverse event (S <sub>01</sub> ) |
| 70% - 90% |                                     | S <sub>10</sub> + 10%<br>S <sub>10</sub> + 5%<br>S <sub>10</sub> + 0%<br>S <sub>10</sub> - 5%<br>S <sub>10</sub> - 10% | 97%                                 | 97%                              |

## Results:

The figure below displays the corrected risk ratios for the scenarios described above. Even under the most extreme scenarios, the risk ratio never exceeds 1.2 or drops below 0.9.

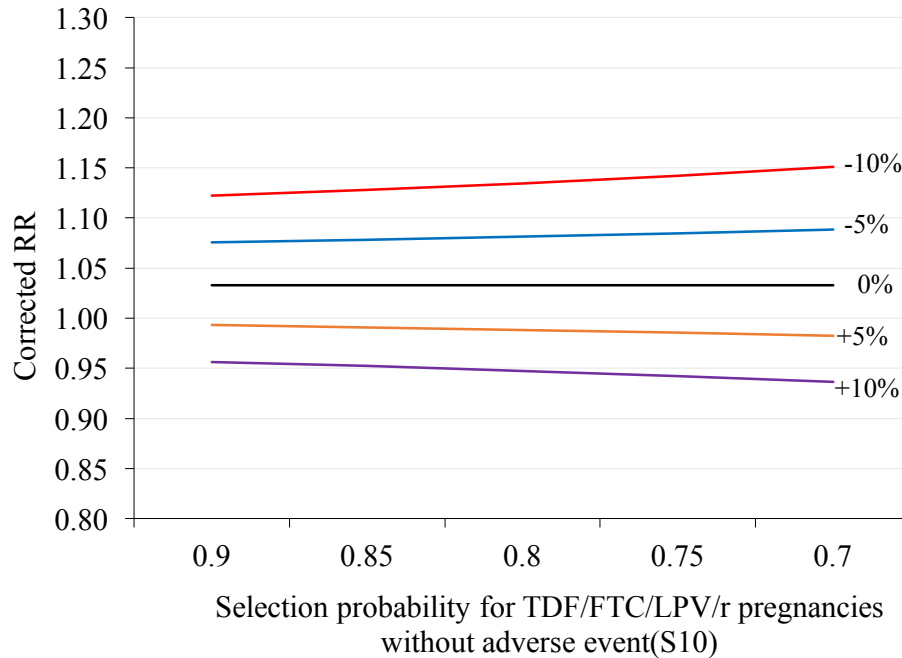

It should be noted that some of the selection probabilities examined are improbably extreme. For instance, the scenario where  $S_{10} = 70\%$  and  $S_{11} = 60\%$  implies that approximately 63 of the 160 women lost to follow-up (40%) would have been in the TDF/FTC/LPV/r exposure group, despite a 2.8% prevalence of TDF/FTC/LPV/r in the primary analysis.

While the results displayed here pertain to the comparison of TDF/FTC/LPV/r and ZDV/3TC/LPV/r for the outcome of adverse events, sensitivity analyses for other outcomes and exposure comparisons yielded similar results.

## Conclusions:

We find that the exclusion of the 160 women lost to follow-up prior to delivery in our primary analyses is unlikely to result in large selection bias in either direction. Even under rather extreme scenarios, our findings appear to be robust to bias from this source.

## Works cited:

- [1] Greenland S. Basic methods for sensitivity analysis of bias. *Int J Epidemiol.* 1996;25(6):1107-16.
- [2] Lash TL, Fink AK, Fox MP. Selection bias. In: *Applying Quantitative Bias Analysis to Epidemiologic Data.* New York: Springer; 2009.
- [3] Huybrechts KF, Palmsten K, Avorn J et al. Antidepressant use in pregnancy and the risk of cardiac defects. *N Engl J Med.* 2014;370:2397-407.
